# Supplementary material
Source: PubMed Central journal article supplement (PMC1459352)

**EntB**

**Vector**

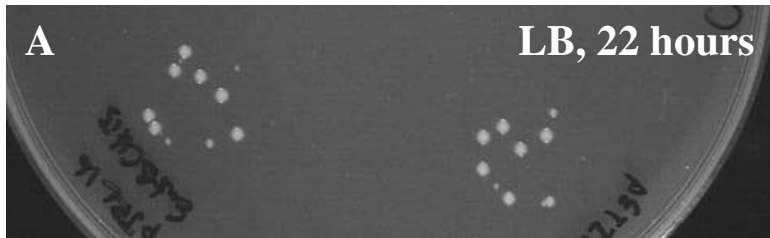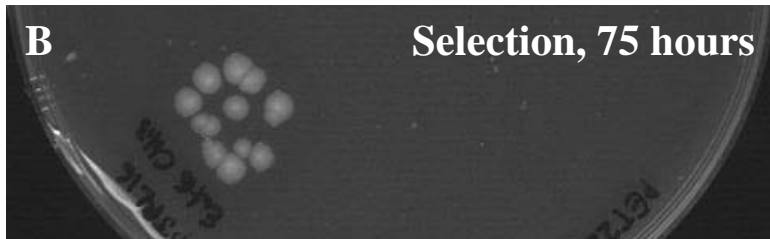

Supplement: pnas_0601038103_1.pdf [file pnas_0601038103_1.pdf]

**A**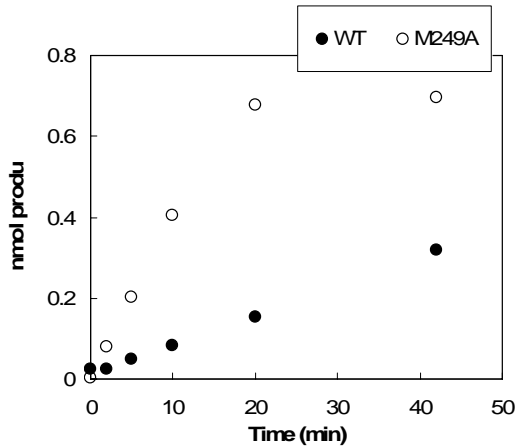**B**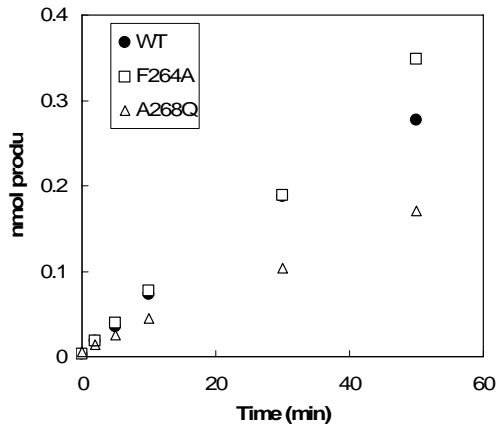

Supplement: pnas_0601038103_2.pdf [file pnas_0601038103_2.pdf]
